# Supplementary material
Source: Royal Society of Chemistry journal article supplement (doi:10.1039/d6ta00045b)
Supplement: d6ta00045b1.pdf [file d6ta00045b1.pdf]

## **Comparative N<sub>2</sub> Fixation Performance of Diverse Micro- and Nanosized 2D Materials Measured by Gas Chromatography**

Jijoe Samuel Prabagar<sup>1</sup>, Joonwoo Seo<sup>1</sup> and Dong-Kwon Lim<sup>1,2,3,\*</sup>

<sup>1</sup> KU-KIST Graduate School of Converging Science and Technology, Korea University, 145 Anam-ro, Seongbuk-gu, Seoul 02841, Republic of Korea

<sup>2</sup> Department of Integrative Energy Engineering, Korea University, 145 Anam-ro, Seongbuk-gu, Seoul 02841, Republic of Korea

<sup>3</sup> Brain Science Institute, Korea Institute of Science and Technology (KIST), 5, Hwarang-ro 14-gil, Seongbuk-gu, Seoul 02792, Republic of Korea

\* Corresponding author. E-mail: [dklim@korea.ac.kr](mailto:dklim@korea.ac.kr)

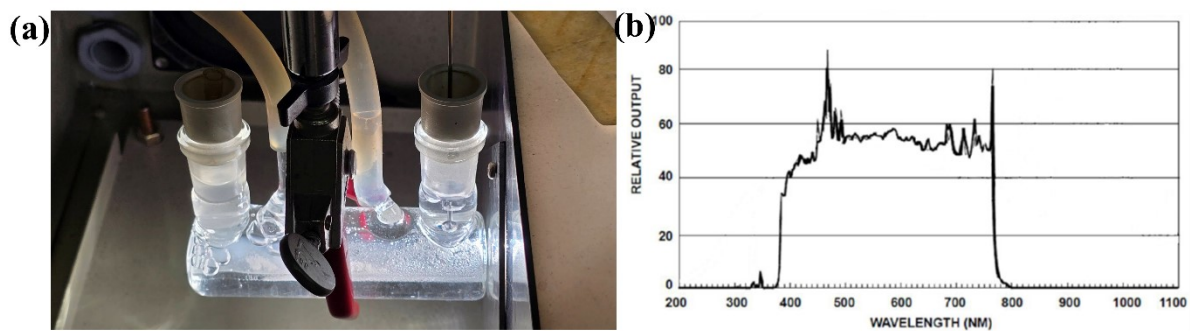

**Fig. S1** (a) Experimental set-up for photocatalytic generation of ammonia employing Xe lamp with a water circulation jacket and (b) Spectrum of light from the Xe lamp (400–780 nm).

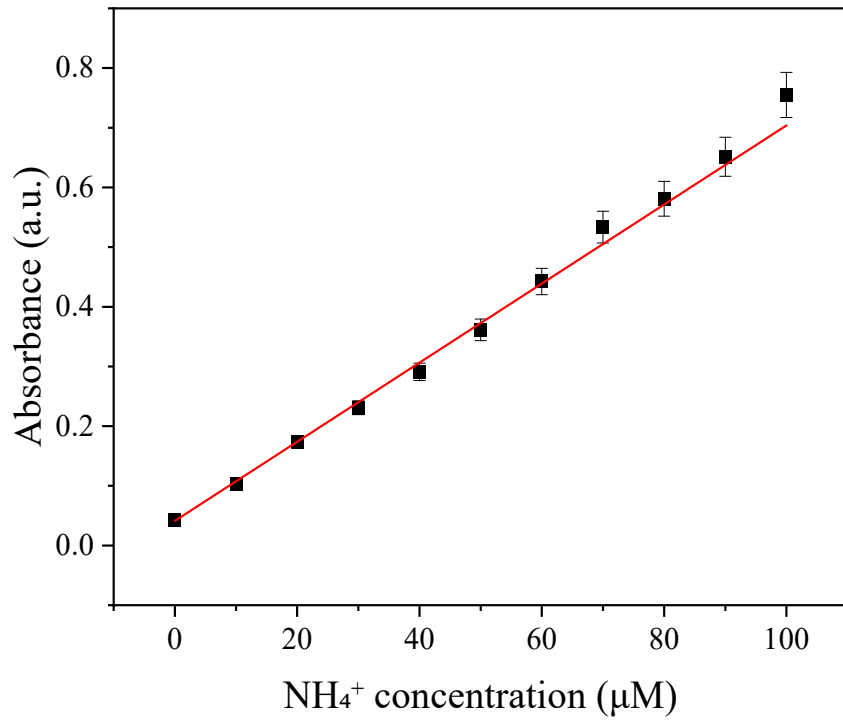

**Fig. S2** Linear relationship between the absorbance at 650 nm and the NH<sub>4</sub><sup>+</sup> concentration.

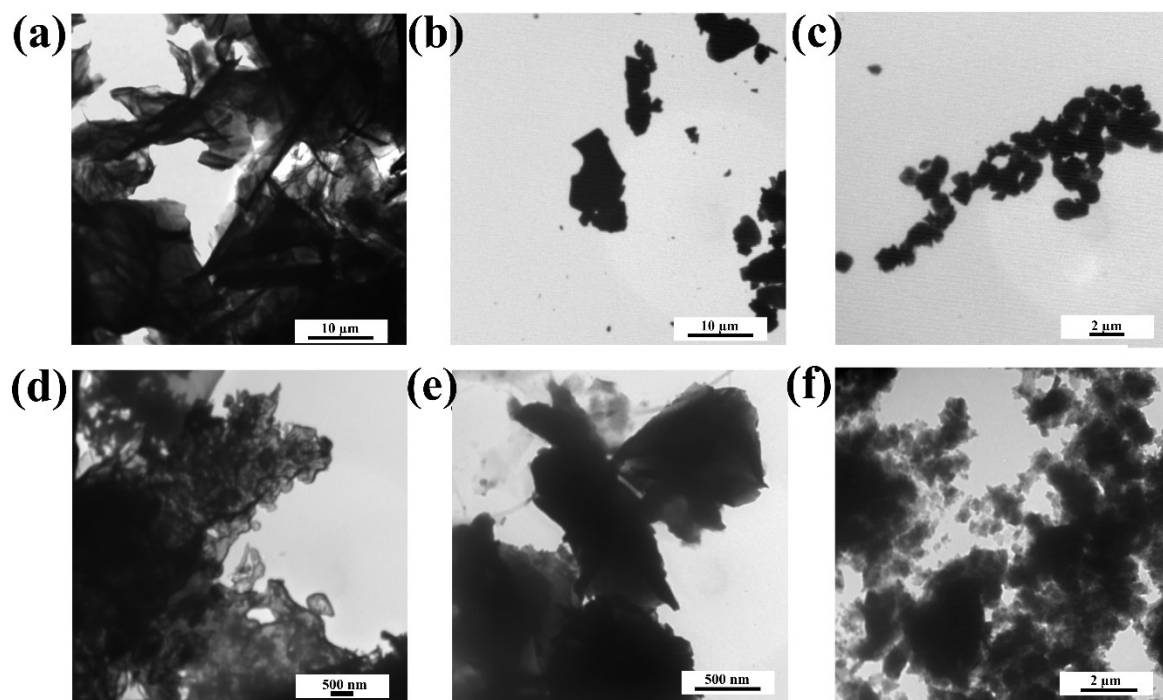

**Fig. S3** TEM image of micro-sized 2D synthesized (a) rGO, (b) MXene, (c) Bi<sub>2</sub>O<sub>3</sub>, (d) gC<sub>3</sub>N<sub>4</sub>, (e) In<sub>2</sub>S<sub>3</sub> and (f) Ni-MOF.

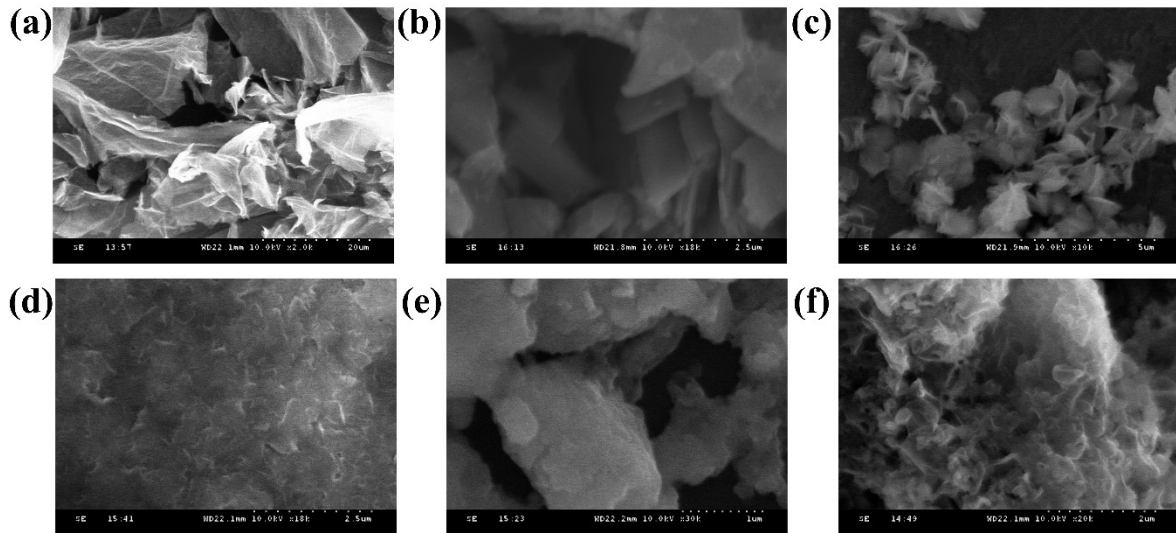

**Fig. S4** SEM image of micro-sized 2D synthesized (a) rGO, (b) MXene, (c) Bi<sub>2</sub>O<sub>3</sub>, (d) gC<sub>3</sub>N<sub>4</sub>, (e) In<sub>2</sub>S<sub>3</sub> and (f) Ni-MOF.

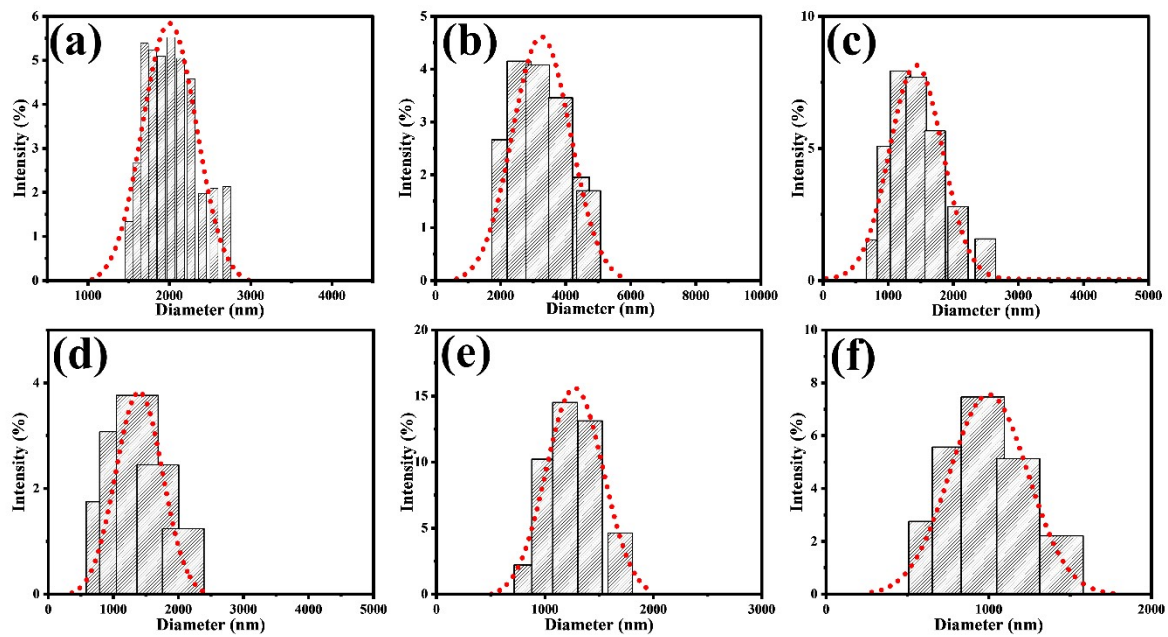

**Fig. S5** Particle size analysis of micro-sized (a) rGO, (b) MXene, (c) Bi<sub>2</sub>O<sub>3</sub>, (d) gC<sub>3</sub>N<sub>4</sub>, (e) In<sub>2</sub>S<sub>3</sub> and (f) Ni-MOF.

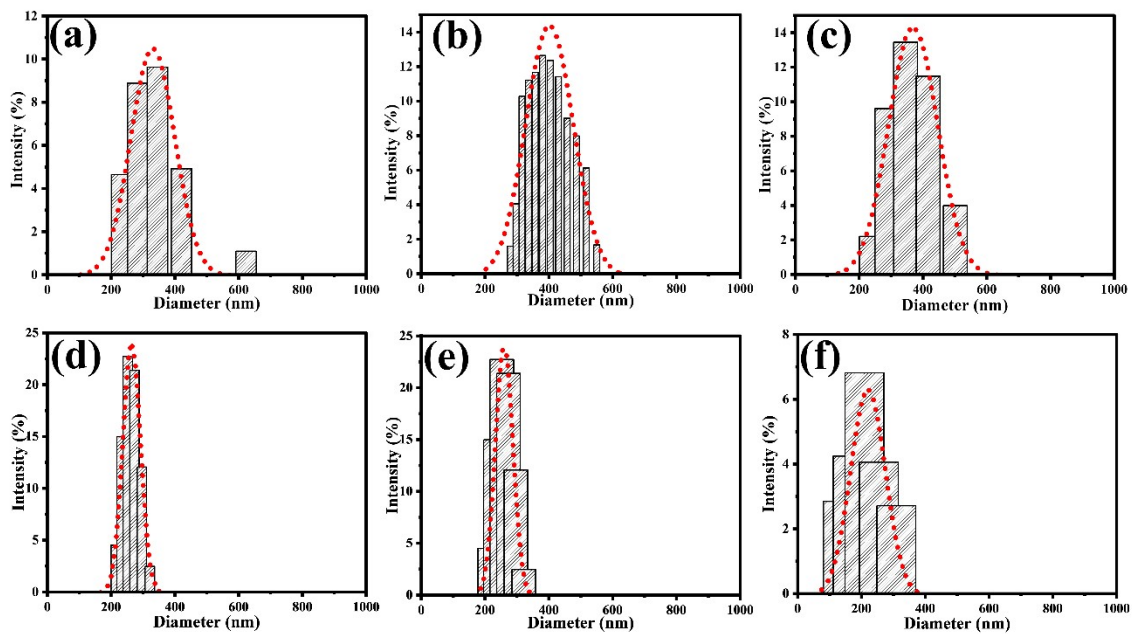

**Fig. S6** Particle size analysis of nano-sized (a) rGO, (b) MXene, (c) Bi<sub>2</sub>O<sub>3</sub>, (d) gC<sub>3</sub>N<sub>4</sub>, (e) In<sub>2</sub>S<sub>3</sub> and (f) Ni-MOF. The data confirms the successful fabrication of nano-sized materials achieved through the sonication technique.

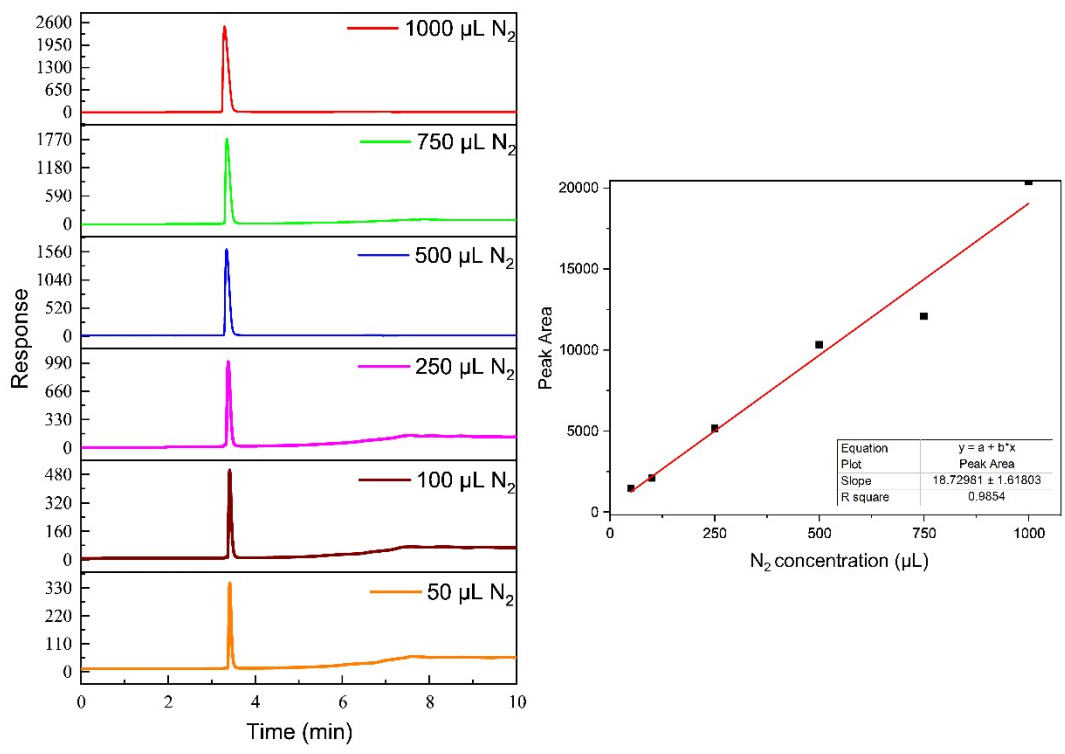

**Fig. S7** Varying N<sub>2</sub> concentration peaks with the corresponding linear calibration curve (right), used to determine the unknown N<sub>2</sub> concentration.

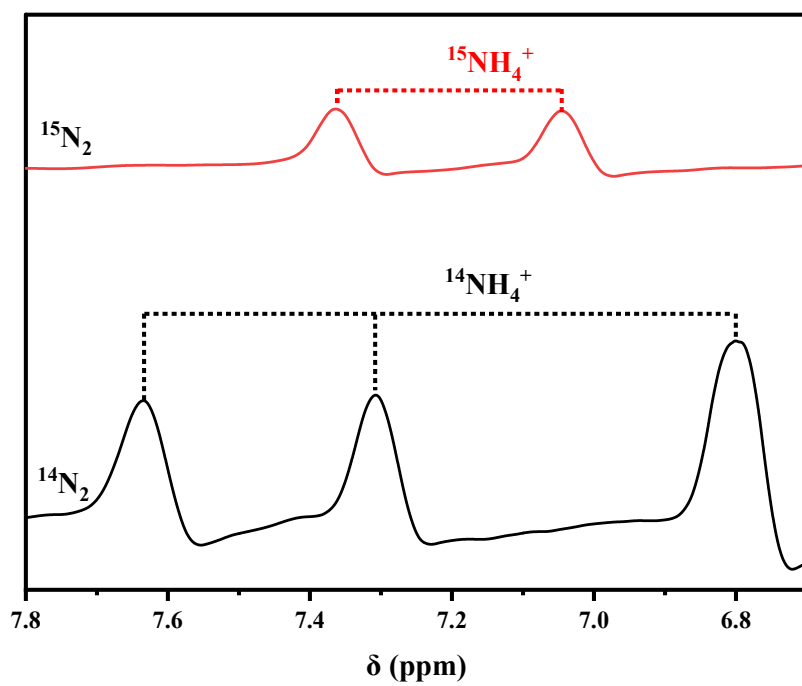

**Fig. S8**  $^1\text{H}$  NMR spectra of  $^{14}\text{NH}_4^+$  and  $^{15}\text{NH}_4^+$  produced from using  $^{14}\text{N}_2$ ,  $^{15}\text{N}_2$ .

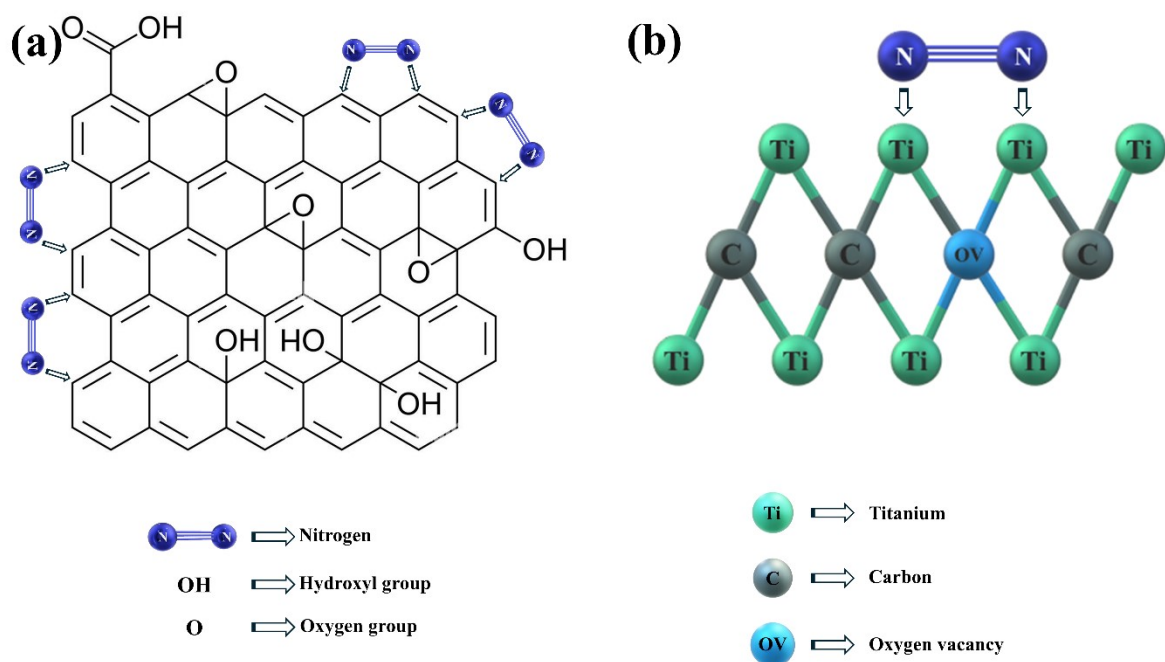

**Fig. S9** Probable  $\text{N}_2$  fixation mechanism on broken carbon edges of (a) rGO forming both 5-membered pyrazole and 6-membered pyridazine and (b) MXene via end-on mode (Ti) along with side-on mode on OV.

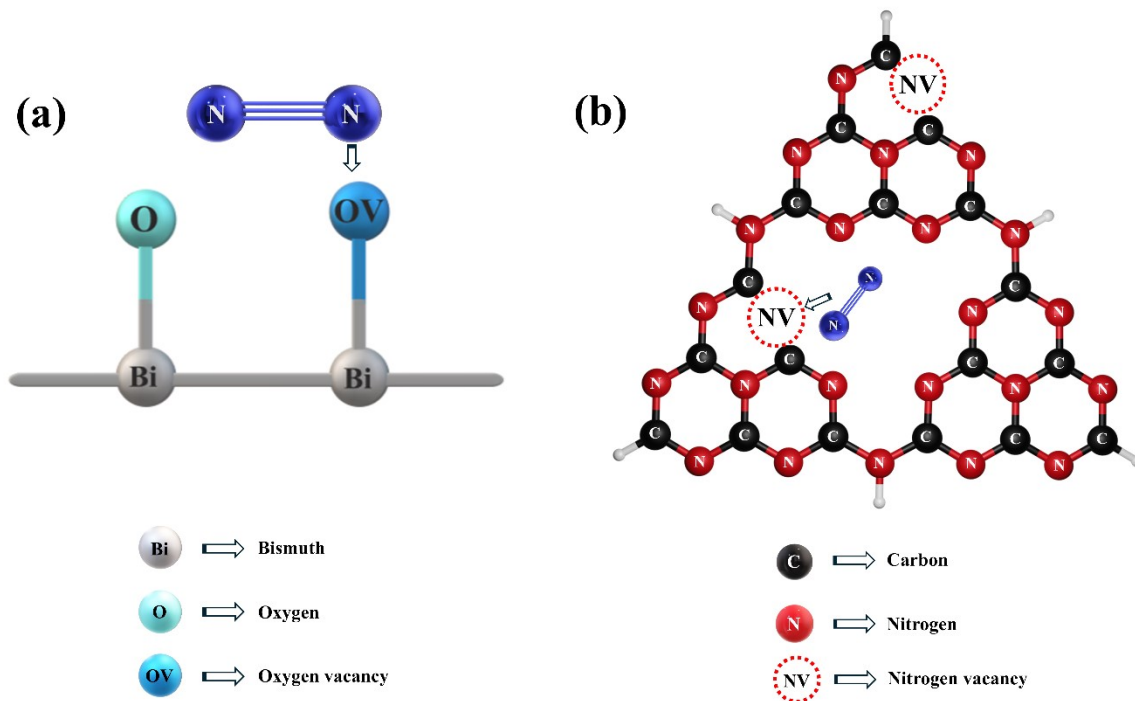

**Fig. S10** Probable  $N_2$  fixation mechanism on (a)  $Bi_2O_3$  through available OVs and (b)  $gC_3N_4$  through NVs.

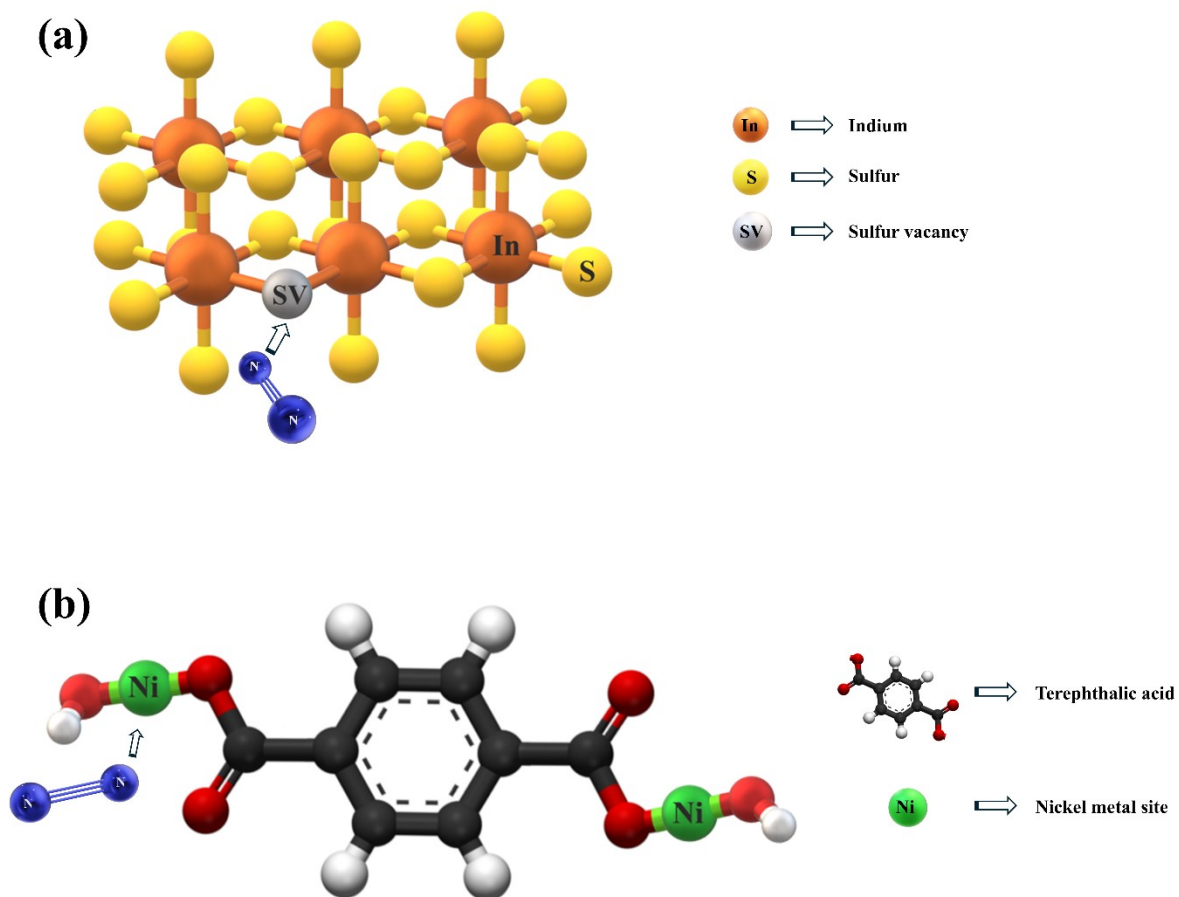

**Fig. S11** Probable  $N_2$  fixation mechanism on (a)  $In_2S_3$  via SVs, and (b) Ni-MOF utilizing active metal sites.

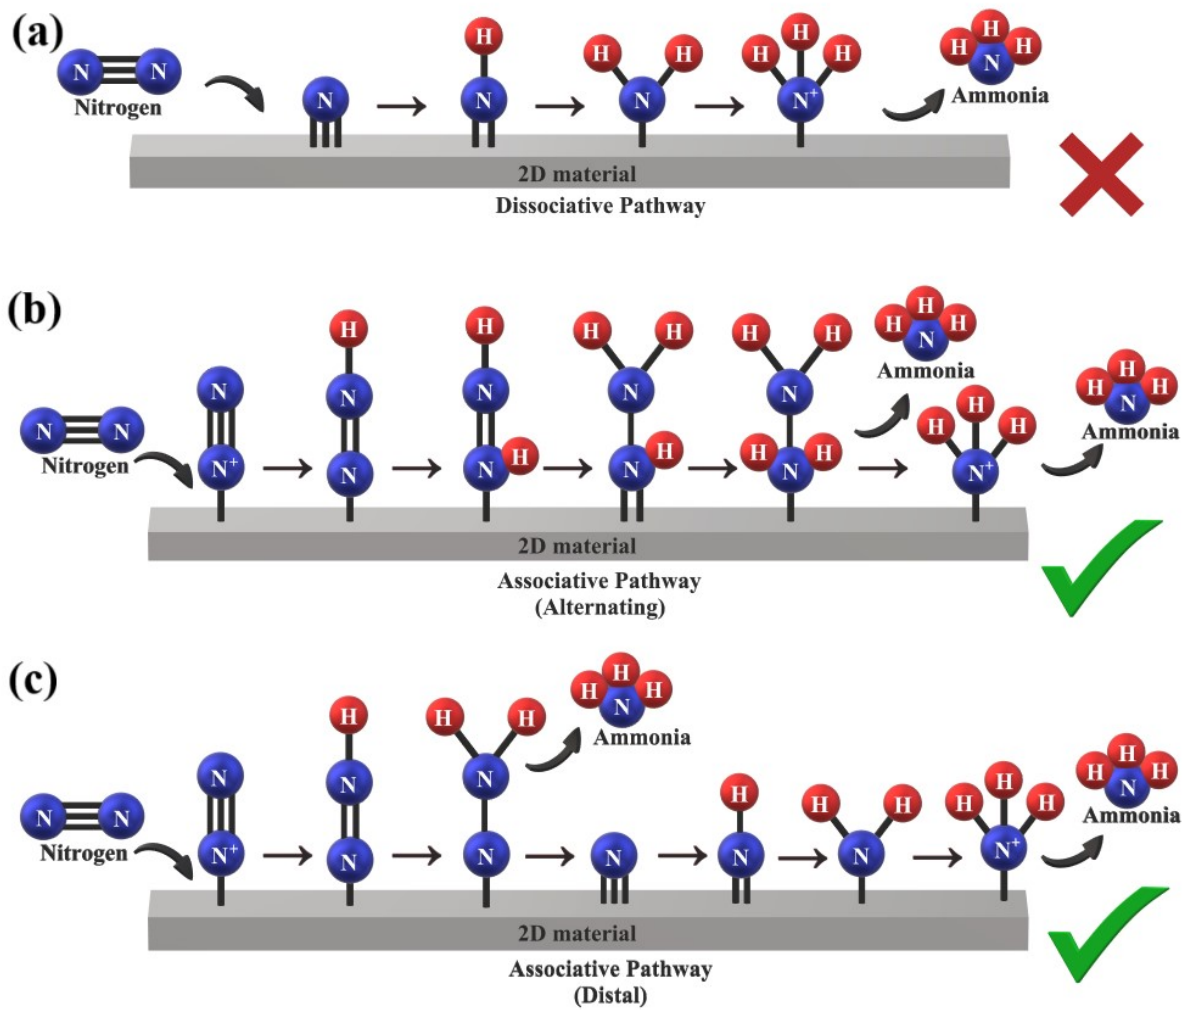

**Fig. S12** The three pathways for ammonia generation: (a) dissociative pathway, (b) alternating associative pathway, and (c) distal associative pathway, where the photocatalytic reaction follows either the alternating or distal associative pathway.

**Table S1** Gibbs free energy ( $\Delta G$ ) for the highest efficient  $gC_3N_4$  with NVs and the lowest efficient Ni-MOF with metal active sites

| Intermediate steps in $N_2$ conversion      | $\Delta G_{gC_3N_4}$ (eV) | $\Delta G_{Ni-MOF}$ (eV) |
|---------------------------------------------|---------------------------|--------------------------|
| $* + N_2 \rightarrow *N_2$                  | -0.73                     | 0.3                      |
| $*N-N + e^- + H^+ \rightarrow *N-NH$        | -1.74                     | 1.74                     |
| $*N-NH + e^- + H^+ \rightarrow *N-NH_2$     | -2.46                     | 1.66                     |
| $*N-NH_2 + e^- + H^+ \rightarrow *N + NH_3$ | -3.9                      | 1.53                     |
| $*N + e^- + H^+ \rightarrow *NH$            | -4.06                     | 2.41                     |
| $*NH + e^- + H^+ \rightarrow *NH_2$         | -3.19                     | 0.37                     |
| $*NH_2 + e^- + H^+ \rightarrow NH_3$        | -2.11                     | -1.22                    |
